# Supplementary material for: Dynamically-Driven Inactivation of the Catalytic Machinery of the SARS 3C-Like Protease by the N214A Mutation on the Extra Domain
Source: PLOS journal article supplement (doi:10.1371/journal.pcbi.1001084), 2011-02-24
Supplement: S10 (10.1371/journal.pcbi.1001084.s010) [file journal.pcbi.1001084.s010]

**Supplementary Table 1: Data collection and refinement statistics of crystal structures of SARS-CoV 3CLpro**

|                                        |                                    |
|----------------------------------------|------------------------------------|
|                                        | SARS-CoV 3CLpro mutant (N214A)     |
| <b>PDB ID</b>                          | 3M3S                               |
| <b>Data collection</b>                 |                                    |
| Space group                            | P2 <sub>1</sub>                    |
| No. of molecule in ASU                 | 2                                  |
| Wavelength (Å)                         | 1.5418                             |
| Resolution (Å)                         | 66.48- 2.3 (2.4-2.3) <sup>b</sup>  |
| Cell dimensions                        |                                    |
| <i>a</i> (Å)                           | 52.50                              |
| <i>b</i> (Å)                           | 96.49                              |
| <i>c</i> (Å)                           | 68.08                              |
| $\sigma$ (°)                           | 90                                 |
| $\beta$ (°)                            | 102.47                             |
| $\gamma$ (°)                           | 90                                 |
| Observed reflections                   | 116159                             |
| Unique reflections                     | 29514 (3511) <sup>b</sup>          |
| $R_{\text{sym}}$ or $R_{\text{merge}}$ | 0.111 (0.427) <sup>b</sup>         |
| $I / \sigma I$                         | 9.78 (1.95) <sup>b</sup>           |
| Completeness (%)                       | 99.9 (99.7) <sup>b</sup>           |
| Redundancy                             | 5.73 (3.22) <sup>b</sup>           |
|                                        |                                    |
| <b>Refinement</b>                      |                                    |
| Resolution (Å)                         | 66.48-2.30(2.36-2.30) <sup>b</sup> |
| No. reflections                        | 27953 (1798) <sup>b</sup>          |
| $R_{\text{work}}$ <sup>c</sup>         | 0.1959 (0.2609) <sup>b</sup>       |
| No. reflections                        | 26059 (1675) <sup>b</sup>          |
| $R_{\text{free}}$ <sup>d</sup>         | 0.2570 (0.3240) <sup>b</sup>       |
| R.m.s. deviations <sup>e</sup>         |                                    |
| Bond lengths (Å)                       | 0.005                              |
| Bond angles (°)                        | 0.984                              |
|                                        |                                    |
| <b>Ramachandran plot</b>               |                                    |
| Favored, %                             | 87.3                               |
| Allowed, %                             | 11.2                               |
| Generously allowed, %                  | 1.1                                |
| Disallowed, %                          | 0.4                                |

<sup>a</sup>One crystal was used for data collection.

<sup>b</sup>Values in parentheses are for the highest-resolution shell.

<sup>c</sup> $R_{\text{work}} = \Sigma(F_{\text{obs}} - F_{\text{calc}}) / \Sigma F_{\text{obs}}$ , where  $F_{\text{calc}}$  and  $F_{\text{obs}}$  are the calculated and observed structure factor amplitudes, respectively.

<sup>d</sup> $R_{\text{free}}$  was calculated in the same manner as  $R_{\text{work}}$ , but for more than 1000 reflections chosen at random and omitted from refinement.

<sup>e</sup>RMSD, root mean square deviation.
